# Supplementary material
Source: Springer Nature journal article supplement (https://www.springermedizin.de/resource/supplementary/12936_2011_1857_MOESM14_ESM.pdf/9541930)

## Frequency of tissues within subgroups

- Blood
- Liver
- ◆ Spleen
- ▲ Kidney
- ▼ Lung
- Brain

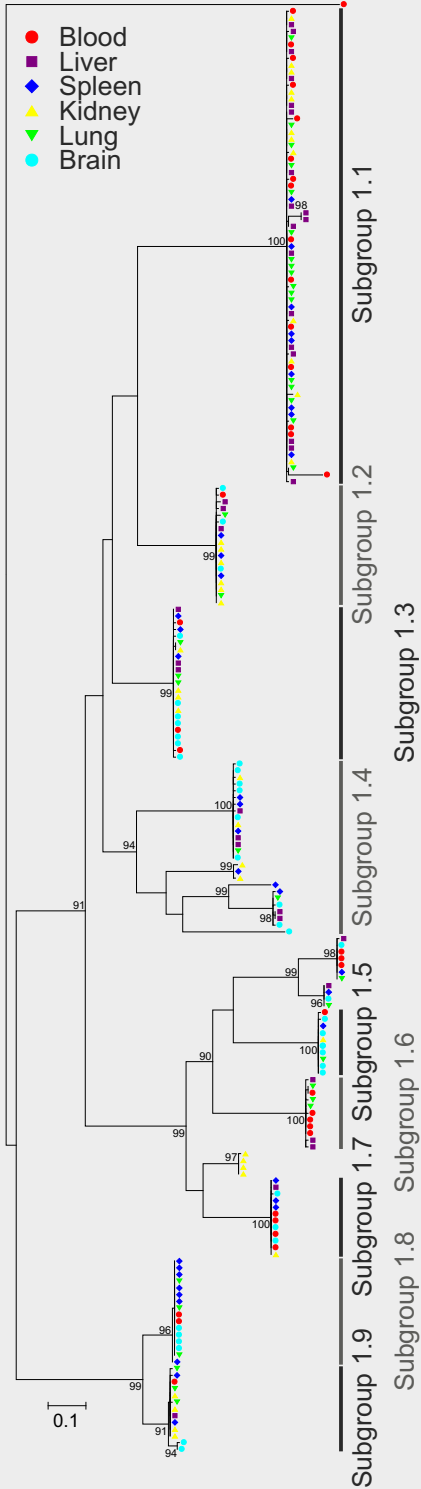

### Subgroup 1.1

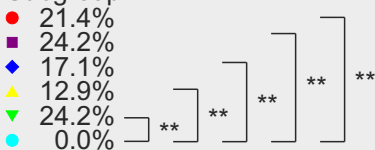

### Subgroup 1.4

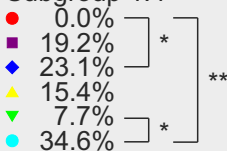

### Subgroup 1.5

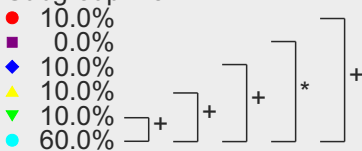

### Subgroup 1.6

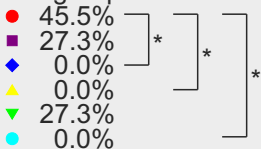

### Subgroup 1.8

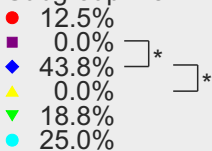

Supplement: MOESM14 [file 9541930]
